# Supplementary material
Source: PubMed Central journal article supplement (PMC3881293)
Supplement: NIHMS528201-supplement-7.pdf [file NIHMS528201-supplement-7.pdf]

**Supplementary Table 7. Studies of School Vending Machines**

| Author, y                            | Design                         | Population                                                                | Outcomes                                                                                                                                                                                        | Duration                           | Intervention/Exposure                                                                                                                                                                                                                                                                                                                                                                                                                                                     | Findings                                                                                                                                                                                                                                                                                                                                                                                                                                                                                                                                                                                                                                                                                                                                                                                                                                             |
|--------------------------------------|--------------------------------|---------------------------------------------------------------------------|-------------------------------------------------------------------------------------------------------------------------------------------------------------------------------------------------|------------------------------------|---------------------------------------------------------------------------------------------------------------------------------------------------------------------------------------------------------------------------------------------------------------------------------------------------------------------------------------------------------------------------------------------------------------------------------------------------------------------------|------------------------------------------------------------------------------------------------------------------------------------------------------------------------------------------------------------------------------------------------------------------------------------------------------------------------------------------------------------------------------------------------------------------------------------------------------------------------------------------------------------------------------------------------------------------------------------------------------------------------------------------------------------------------------------------------------------------------------------------------------------------------------------------------------------------------------------------------------|
| Nickelson et al, 2010 <sup>244</sup> | Observational, cross-sectional | 8 public middle schools<br><br>N=4049<br><br>Age: 6th-8th grades          | <ul style="list-style-type: none"> <li>• Self-reported parental limits on soft drink intake</li> <li>• School vending machine soft drink purchases</li> <li>• Soft drink consumption</li> </ul> | Survey taken during 1 class period | <p>YRBSS</p> <ul style="list-style-type: none"> <li>• Observed 7 items from YRBSS in relation to purchases of soft drinks from school vending machines and consumption of soft drinks at school/home</li> <li>• Examined survey question about parental limits on consumption of soft drinks</li> <li>• Measured age, sex, race/ethnicity, milk, and fruit juice intake</li> </ul>                                                                                        | <ul style="list-style-type: none"> <li>• 67% of students reported consuming no soft drinks per day.</li> <li>• 54% of students reported no parental limits on consumption, 33% reported a limit of 1 soft drink per day, and 14% reported a limit of 2-3 soft drinks per day.</li> <li>• The greatest number of purchasers of soft drinks from school vending machines were students who reported a parental limit of 2-3 soft drinks per day (29%) or no parental limit (27%) (<math>P&lt;0.001</math>).</li> <li>• Students with the lowest soft drink purchases from school vending machines (20%) reported a parental limit of 1 soft drink per day (<math>P&lt;0.001</math>).</li> </ul>                                                                                                                                                        |
| Park et al, 2010 <sup>246</sup>      | Observational, cross-sectional | 73 Florida public middle schools<br><br>N=4322<br><br>Age: 6th-8th grades | <ul style="list-style-type: none"> <li>• Use of school vending machines</li> <li>• Consuming snacks/caloric beverages in place of lunch</li> </ul>                                              | Spring 2003                        | <p>Florida Youth Physical Activity and Nutrition Survey</p> <ul style="list-style-type: none"> <li>• Statewide, self-reported school-based survey for middle school students to monitor attitudes, behaviors, physical activity, and nutrition knowledge</li> <li>• Developed by Florida Dept of Health</li> <li>• Survey examined vending machine types and items offered</li> <li>• Items were grouped into healthier and less healthy snacks and beverages.</li> </ul> | <ul style="list-style-type: none"> <li>• 99% of students reported the presence of a vending machine serving snacks, 89% reported a beverage vending machine, and 88% reported having both.</li> <li>• 70% reported buying less healthy snacks and 69% reported buying less healthy beverages.</li> <li>• In schools with a beverage vending machine, more students (19%) selected snacks/beverages instead of lunch than in schools without beverage vending machines (7%) (<math>P&lt;0.05</math>).</li> <li>• Students in schools with a beverage machine had a higher risk for buying lunch from the vending machine (adjusted OR=3.5; 95% CI, 2.2-5.7).</li> <li>• Students who bought snacks/beverages from the vending machines instead of school lunch <math>\geq 3</math> days per week more often purchased less healthy snacks.</li> </ul> |
| Thompson et al, 2010 <sup>245</sup>  | Observational, cross-sectional | Public school students<br><br>N=869                                       | <ul style="list-style-type: none"> <li>• Access to school vending machines</li> <li>• Food purchases and dietary intakes</li> </ul>                                                             | Given May–June 2005                | <p>Youth Styles Survey</p> <ul style="list-style-type: none"> <li>• Consumer mail panel survey as part of Styles survey</li> <li>• Survey inquired about school</li> </ul>                                                                                                                                                                                                                                                                                                | <ul style="list-style-type: none"> <li>• 58.7% of students reported that access to school vending machines was restricted to certain hours. The majority of these students reported not making any purchases from the vending machine (<math>P&lt;0.05</math>).</li> <li>• Students who bought food from the</li> </ul>                                                                                                                                                                                                                                                                                                                                                                                                                                                                                                                              |

|                                       |                                               |                                                                                                                                     |                                                                                                                                                                             |                                             |                                                                                                                                                                                                                                                                                                                                                                          |                                                                                                                                                                                                                                                                                                                                                                                                                                                                                                                                                                                                                                                                                                                                                                                                                                                                                        |
|---------------------------------------|-----------------------------------------------|-------------------------------------------------------------------------------------------------------------------------------------|-----------------------------------------------------------------------------------------------------------------------------------------------------------------------------|---------------------------------------------|--------------------------------------------------------------------------------------------------------------------------------------------------------------------------------------------------------------------------------------------------------------------------------------------------------------------------------------------------------------------------|----------------------------------------------------------------------------------------------------------------------------------------------------------------------------------------------------------------------------------------------------------------------------------------------------------------------------------------------------------------------------------------------------------------------------------------------------------------------------------------------------------------------------------------------------------------------------------------------------------------------------------------------------------------------------------------------------------------------------------------------------------------------------------------------------------------------------------------------------------------------------------------|
|                                       |                                               |                                                                                                                                     |                                                                                                                                                                             |                                             | vending machine access, purchasing behaviors, school rules about vending machines, individual dietary intakes, and purchase of pizza/fried foods from the school cafeteria.                                                                                                                                                                                              | vending machine $\geq 3$ days per week were more likely to have unrestricted access to vending machines (OR=1.71; 95% CI, 1.13-2.59), drink soda (OR=3.21; 95% CI, 1.87-5.51), and eat chocolate/candy (OR=2.71; 95% CI, 1.34-5.46) at least 1 or more times per day.<br><ul style="list-style-type: none"> <li>Students who bought lunch 1-2 times per week were more likely to buy fried foods/pizza from the school cafeteria (OR=2.43; 95% CI, 1.69-3.49); those buying food <math>&gt;3</math> times per week were even more likely to buy fried foods/pizza (OR=5.05; 95% CI, 3.10-8.22).</li> </ul>                                                                                                                                                                                                                                                                             |
| Fiske and Cullen, 2004 <sup>109</sup> | RCT                                           | 10 vending machines in teachers' lounges in Texas elementary and middle schools                                                     | <ul style="list-style-type: none"> <li>Assessed items sold</li> <li>Assessed dollar sales for items</li> <li>Total machine revenue</li> </ul>                               | 2-wk baseline assessment; 4-wk intervention | Teacher vending machines: <ul style="list-style-type: none"> <li>Each machine had 28 snack items and 5 choices of gum.</li> <li>Low-fat items were promoted by <ul style="list-style-type: none"> <li>Labels (intervention I, 4 machines)</li> <li>Labels plus signs (intervention II, 4 machines)</li> <li>No intervention (control, 2 machines)</li> </ul> </li> </ul> | <ul style="list-style-type: none"> <li>Intervention I resulted in a trend toward a small increase in sales of low-fat items (<math>P=0.08</math>).</li> <li>Intervention II resulted in more target foods sold, without a significant effect on total dollar sales (<math>P=0.11</math>).</li> <li>A significant difference in total machine revenue was not seen in either intervention.</li> </ul>                                                                                                                                                                                                                                                                                                                                                                                                                                                                                   |
| Gorton et al, 2010 <sup>247</sup>     | Quasi-experimental (pre- vs postintervention) | 14 vending machines at 2 hospital sites<br><br>N=835 at baseline; N=611 at follow-up<br><br>(Included here although worksite-based) | <ul style="list-style-type: none"> <li>Web-based staff surveys: 1 preintervention and 1 midway through intervention</li> <li>Sales data pre- vs postintervention</li> </ul> | March–May 2007 and March–May 2008           | Hospital vending machines: <ul style="list-style-type: none"> <li>Intervention to provide at least 50% more healthy choices in vending machines (defined as <math>&lt;800</math> kJ, <math>&lt;1.5</math> g saturated fat per 100 g, <math>&lt;450</math> mg per 100 g nonconfectionery items), and 50% other choices (<math>&lt;800</math> kJ)</li> </ul>               | <ul style="list-style-type: none"> <li>Preintervention: 16% of staff used vending machines <math>\geq 1</math> time per day, 51% said they tried to choose healthier items, and 84% reported they never or infrequently used vending machines.</li> <li>Mid intervention: no significant changes.</li> <li>End intervention: no significant changes. 15% used vending machines <math>&gt;1</math> time per day, 53% said they tried to choose healthier items, and 85% reported they never or infrequently used vending machines.</li> <li>87% of staff who frequented vending machines reported noticing that healthier snacks were available.</li> <li>54% of staff who frequented vending machines reported changing their choices, with 31% doing so to make healthier choices.</li> <li>Postintervention, average purchase: 40% lower kJ, 32% lower total fat, and 41%</li> </ul> |

|  |  |  |  |  |  |                     |
|--|--|--|--|--|--|---------------------|
|  |  |  |  |  |  | lower saturated fat |
|--|--|--|--|--|--|---------------------|

YRBSS indicates Youth Risk Behavior Surveillance System; OR, odds ratio; CI, confidence interval; and RCT, randomized controlled trial.

Note: Reference numbers (eg, Nickelson et al, 2010<sup>238</sup>) appearing in this supplementary table correspond with those listed in the reference section of the statement. For the purposes of this supplementary table, these meta-analyses or systematic reviews (see "Author, y" column) are considered the primary citation. Additional studies mentioned in the primary citation may be included in the "Intervention/Exposure" and "Findings" columns. The additional studies can be accessed through the primary citation.
